# Supplementary material for: LOXL2-induced PEAR1 Ser891 phosphorylation suppresses CD44 degradation and promotes triple-negative breast cancer metastasis
Source: PubMed Central journal article supplement (PMC11324313; doi:10.1172/jci177357), 2024-08-15

Full unedited blot for Figure [1D]

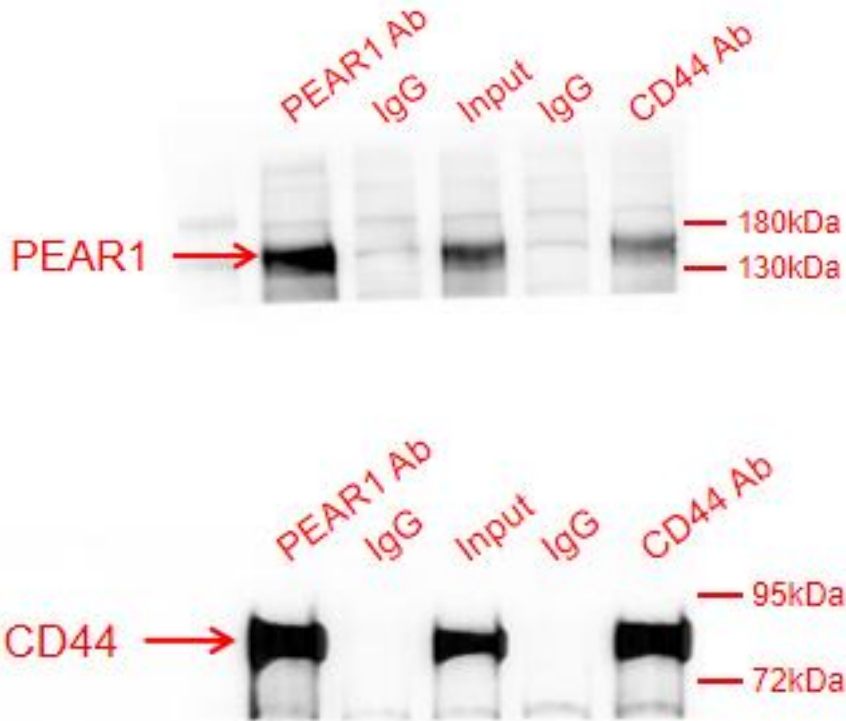

# Full unedited blot for Figure [3A]

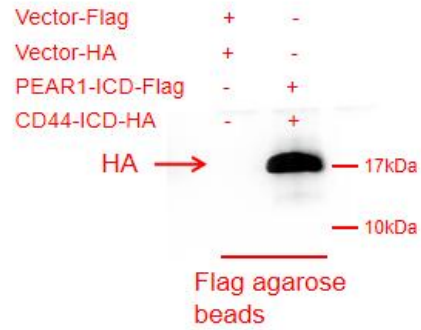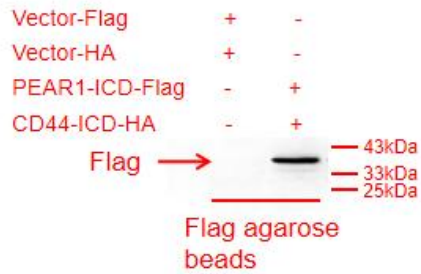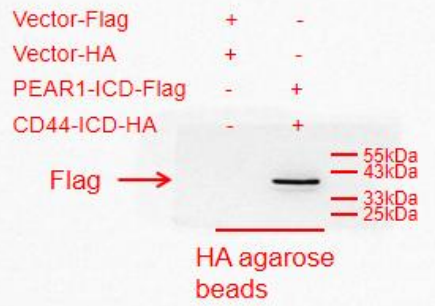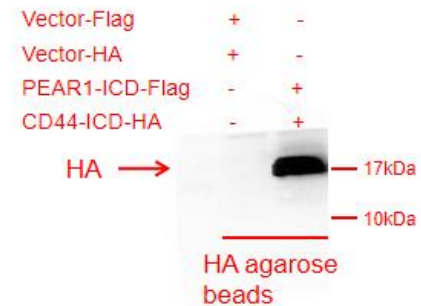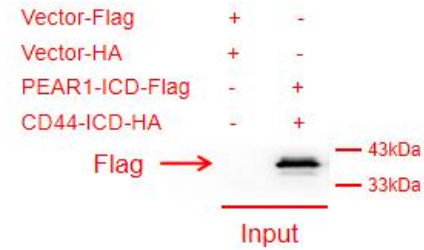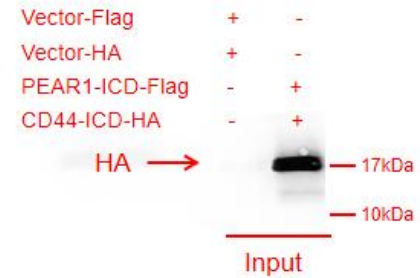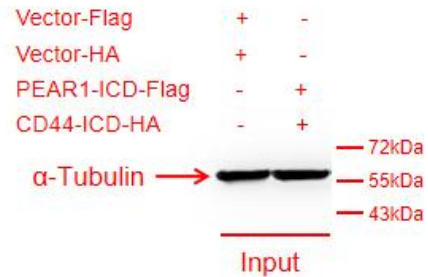

# Full unedited blot for Figure [3B]

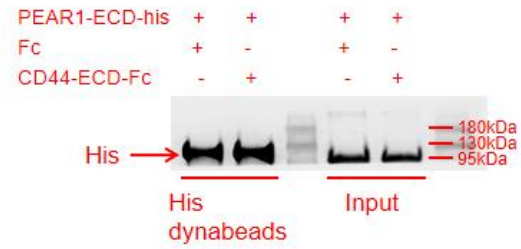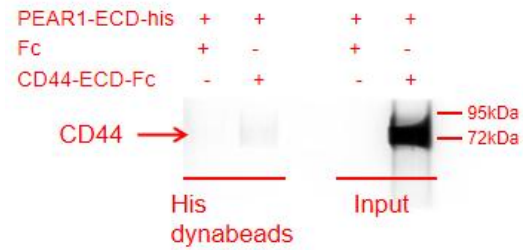

Full unedited blot for Figure [3D]

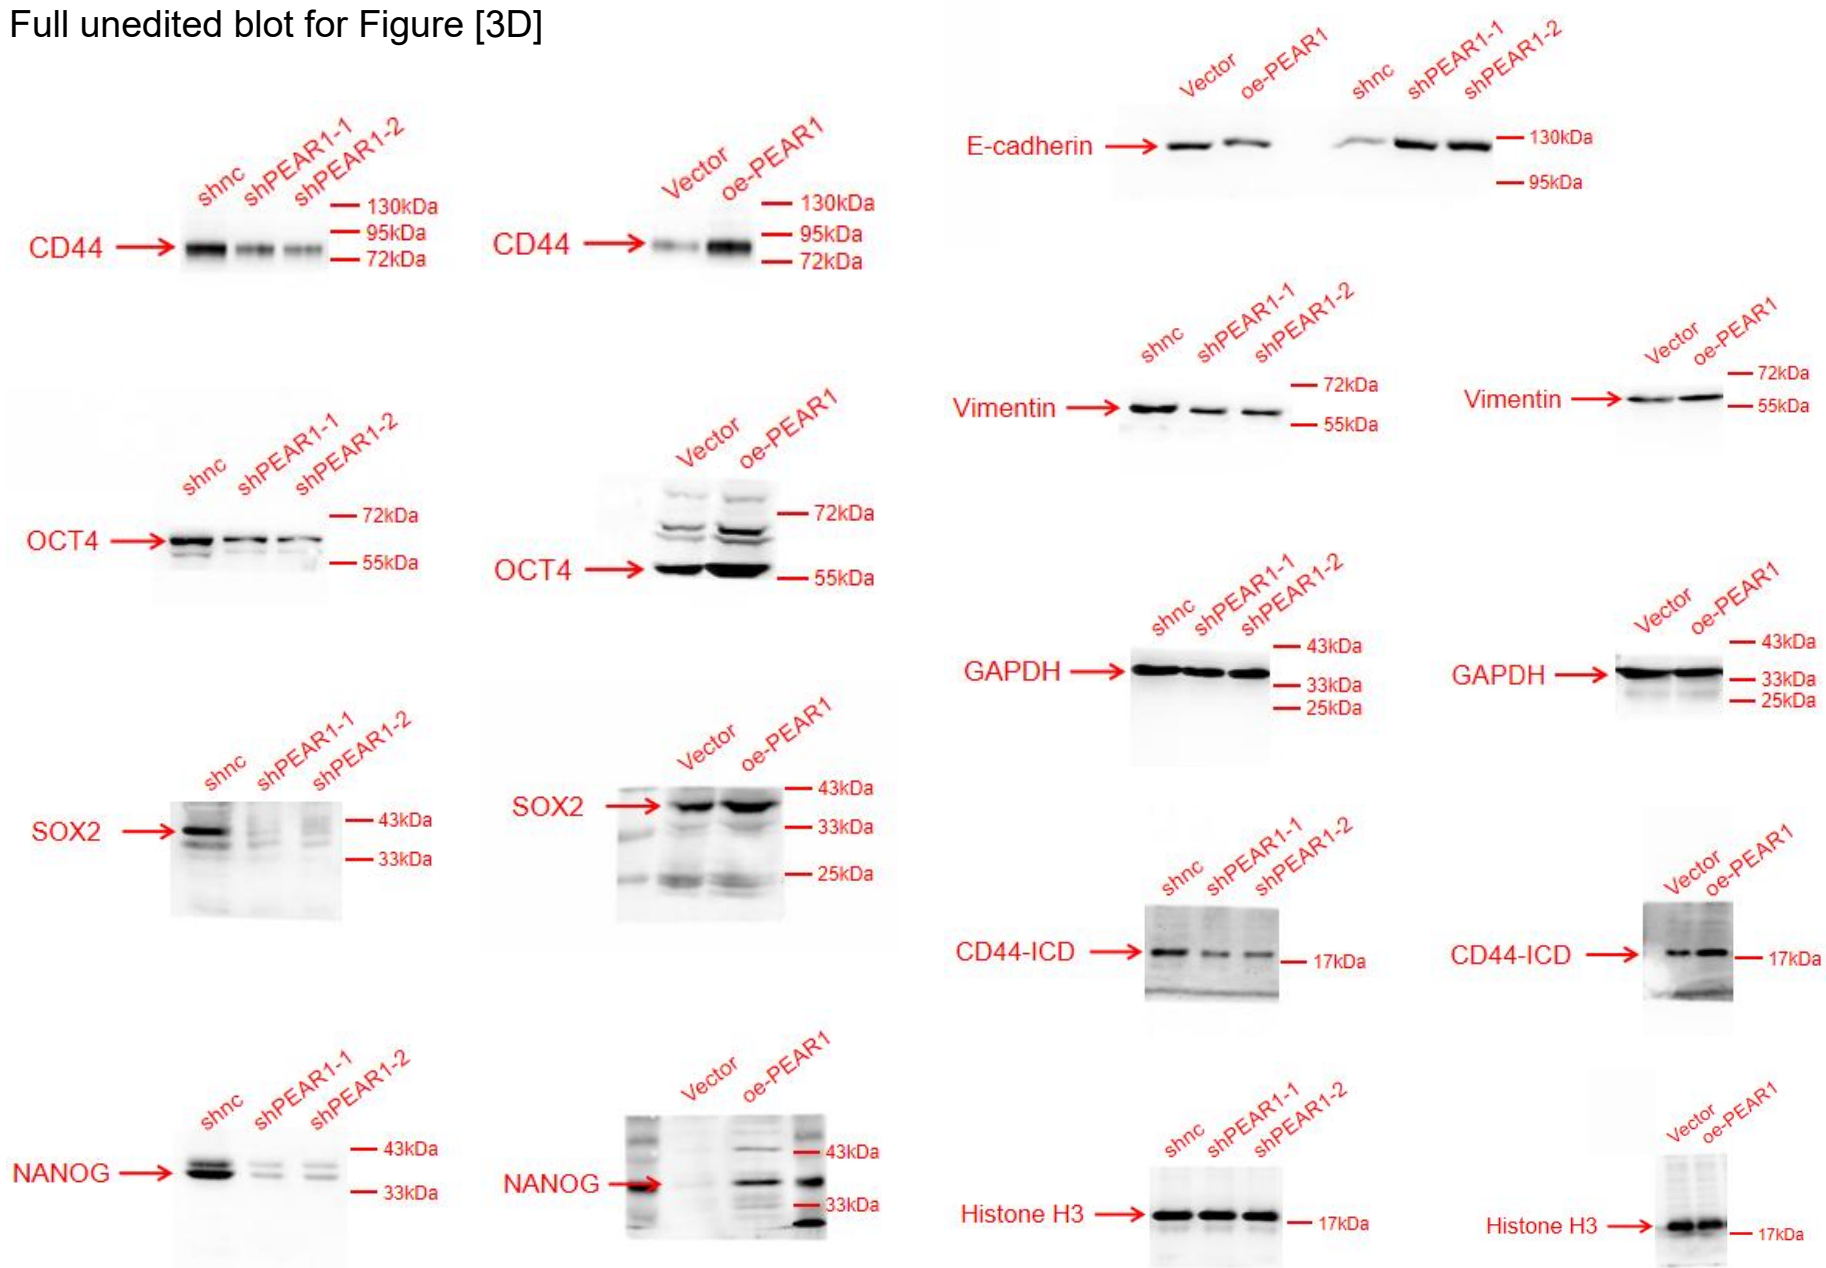

Full unedited blot for Figure [3F]

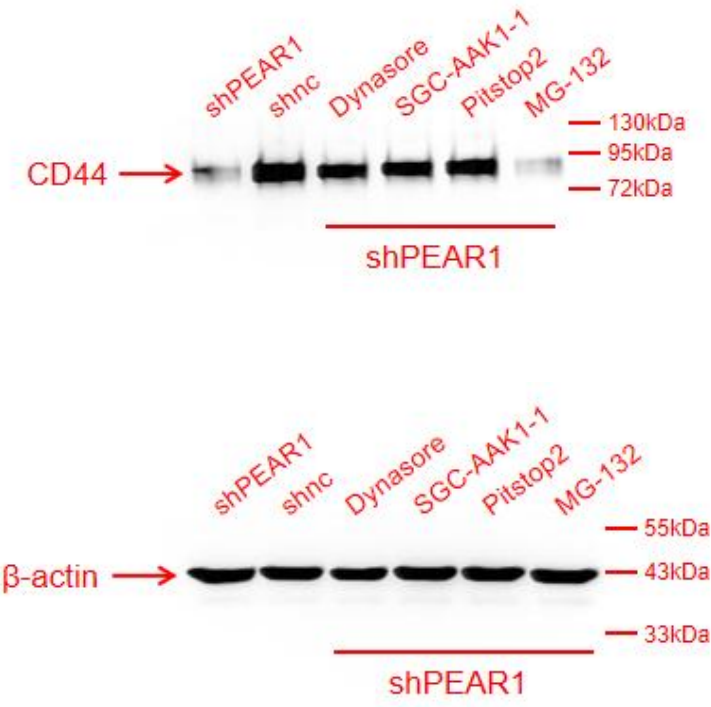

Full unedited blot for Figure [4A]

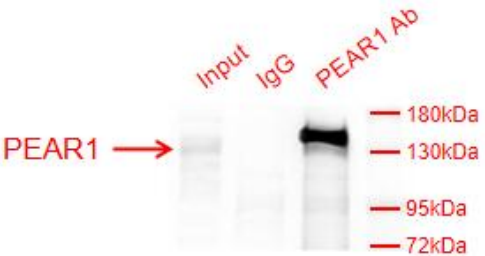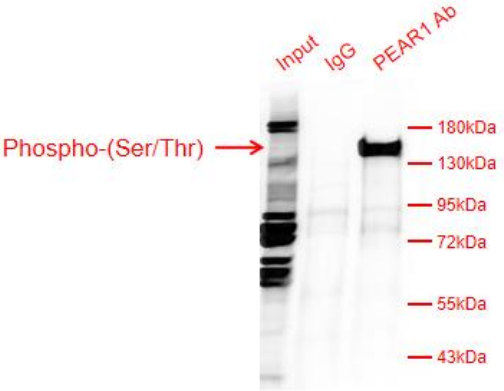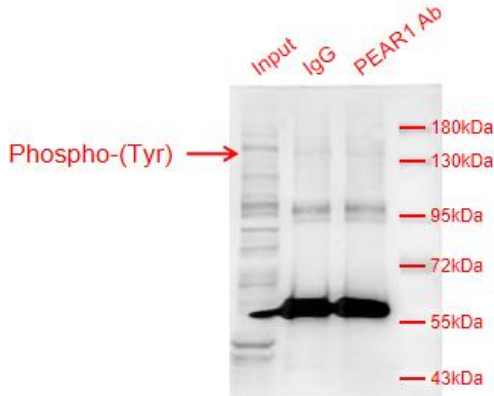

# Full unedited blot for Figure [4B]

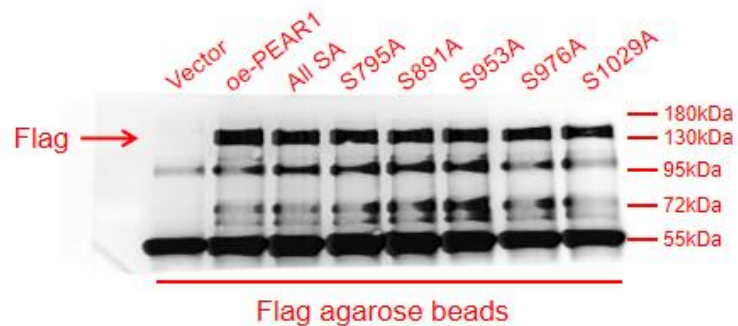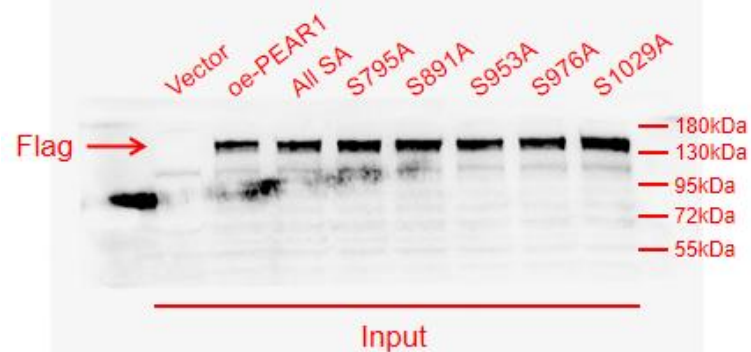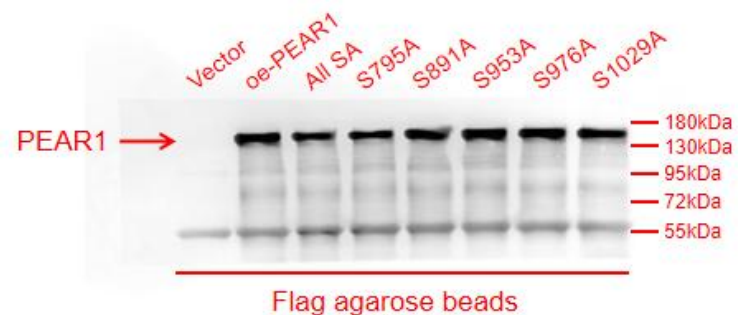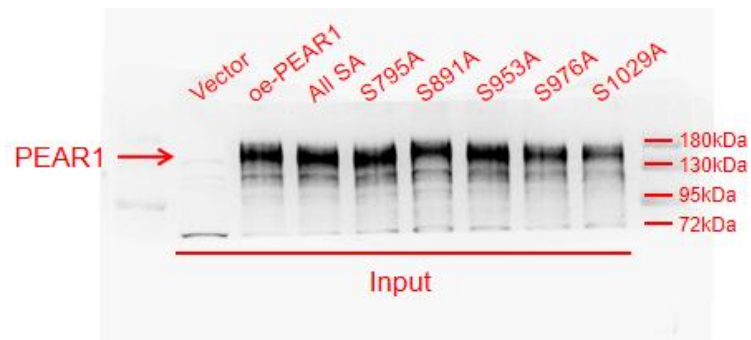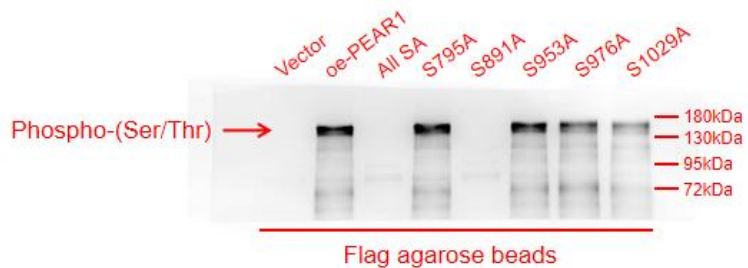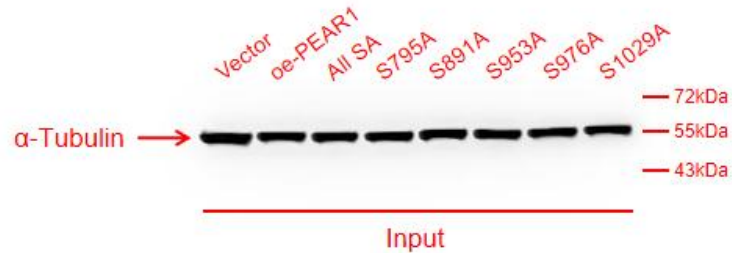

Full unedited blot for Figure [4C]

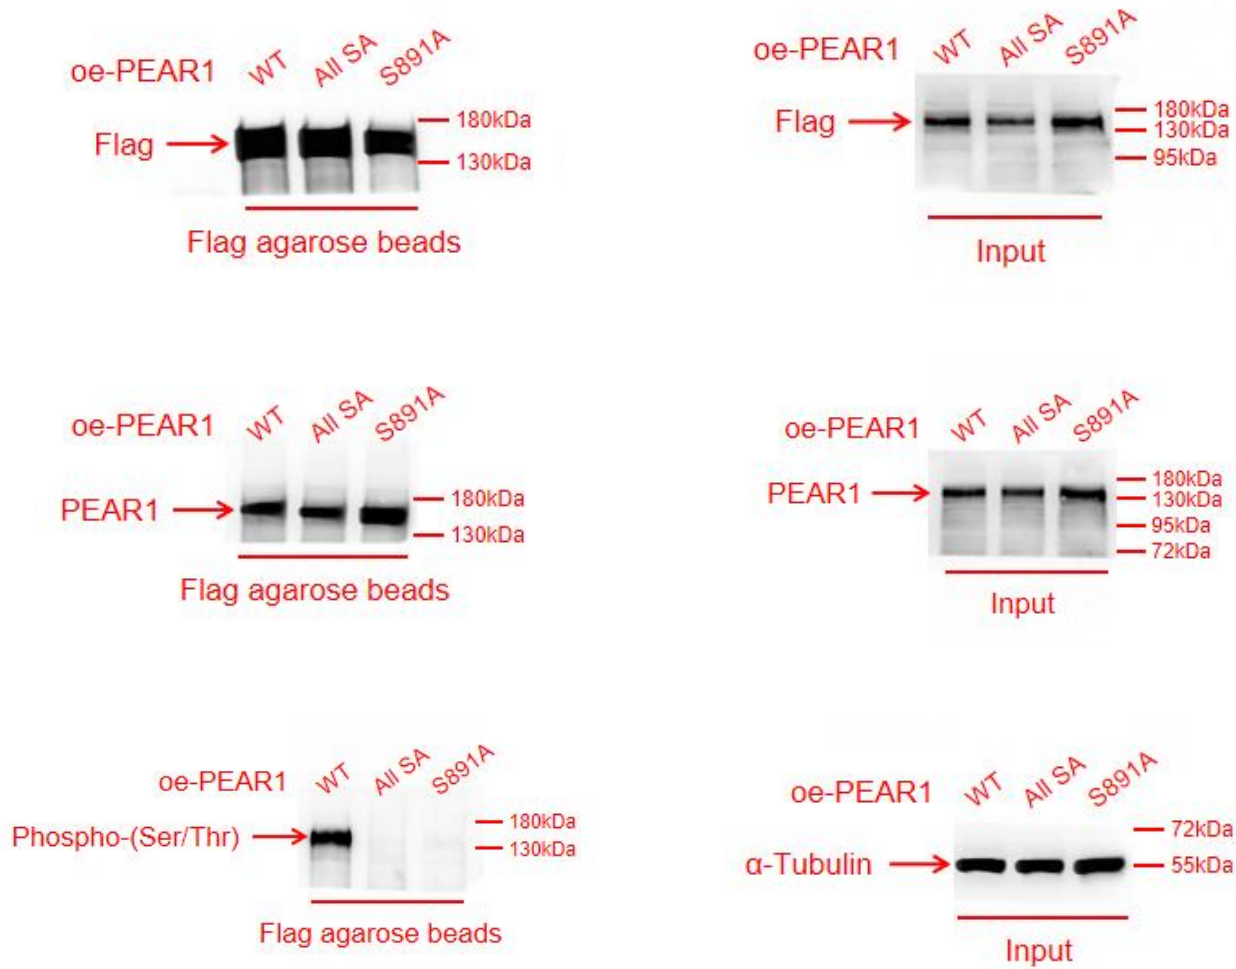



Full unedited blot for Figure [4D]

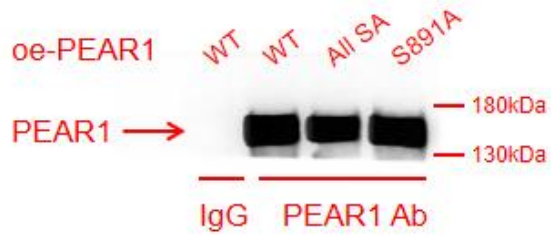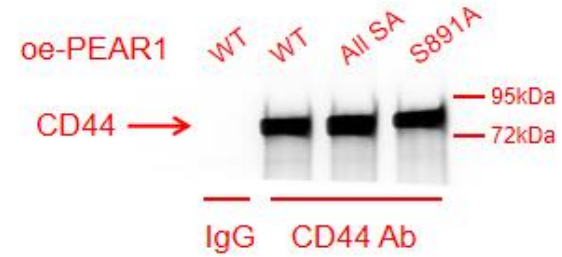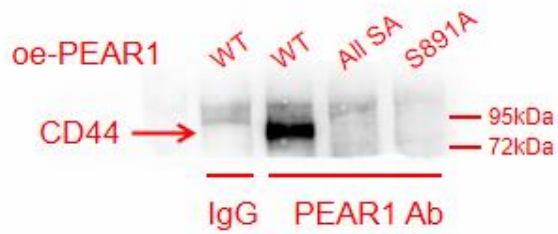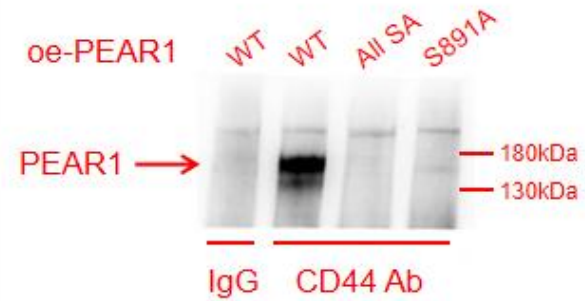

# Full unedited blot for Figure [4E]

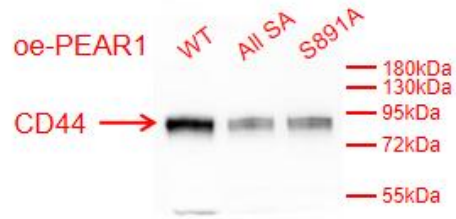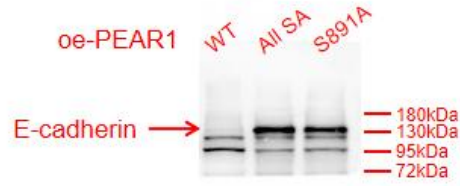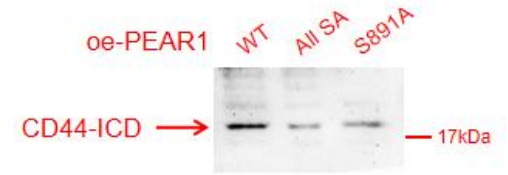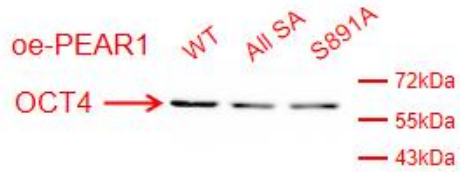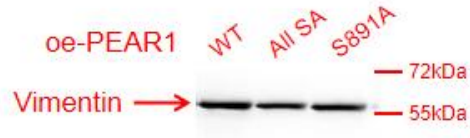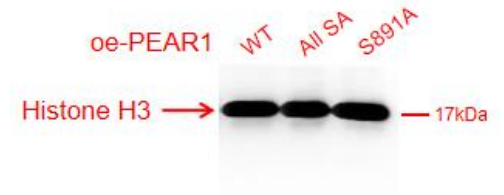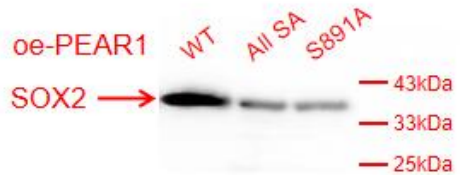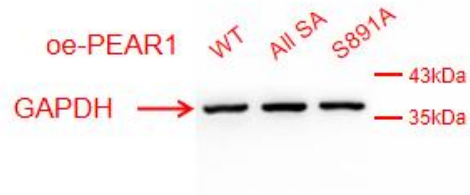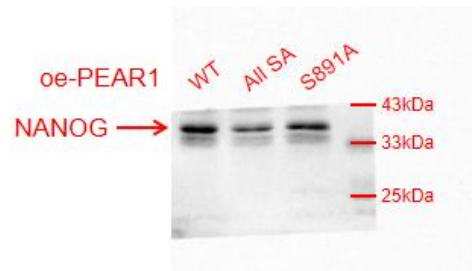

Full unedited blot for Figure [4F]

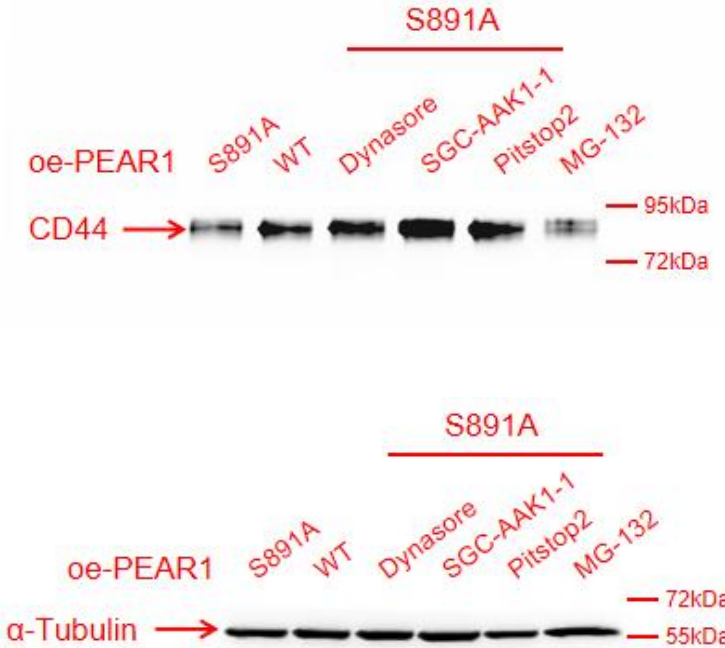

Full unedited blot for Figure [5A]

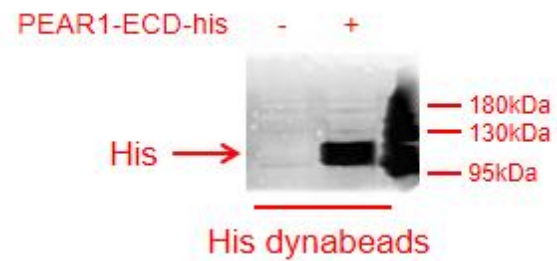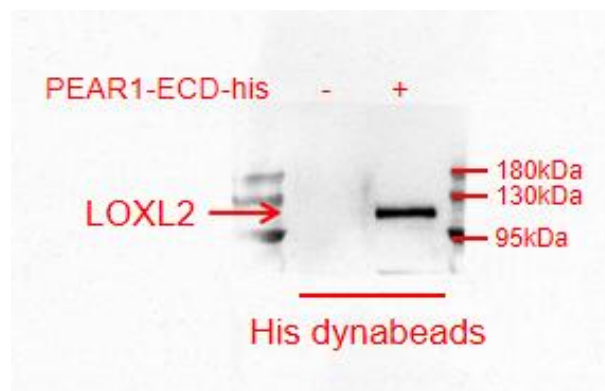

# Full unedited blot for Figure [5E]

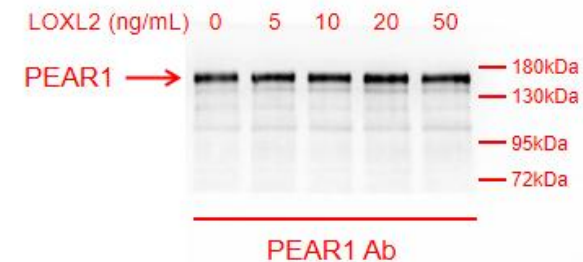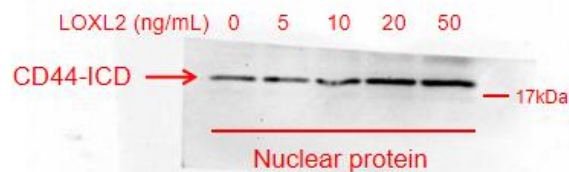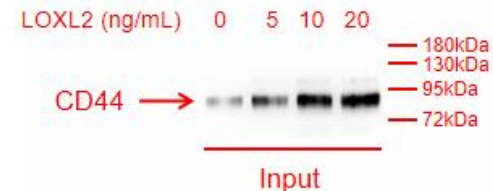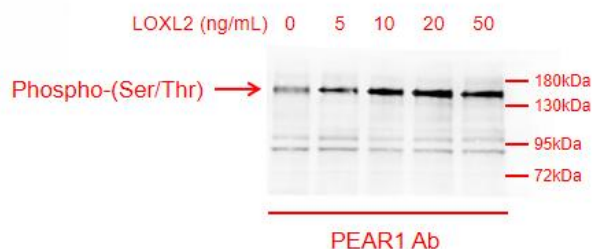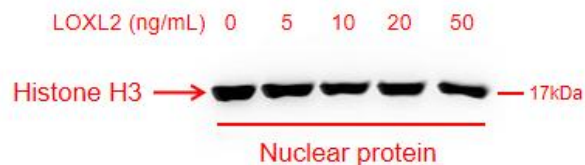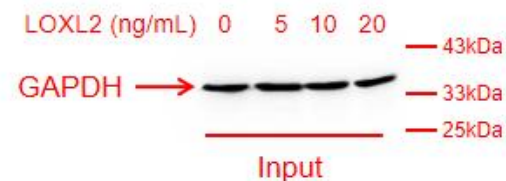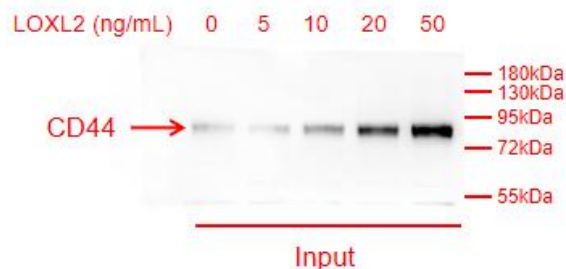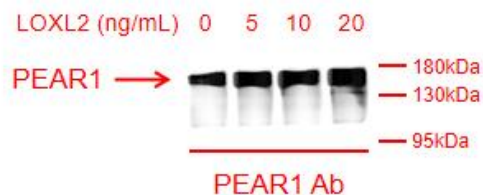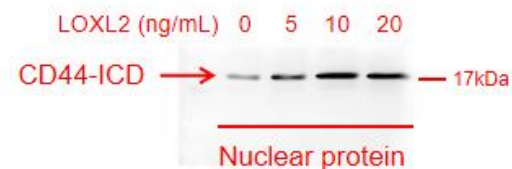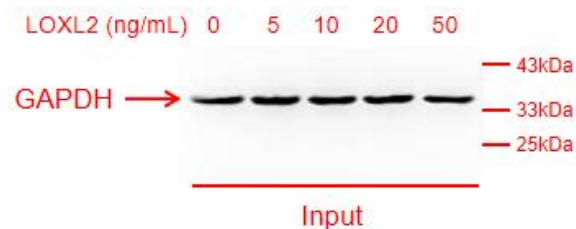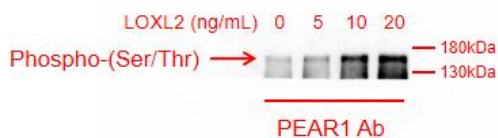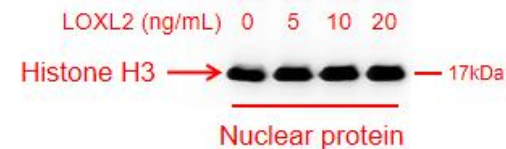

Full unedited blot for Figure [5I]

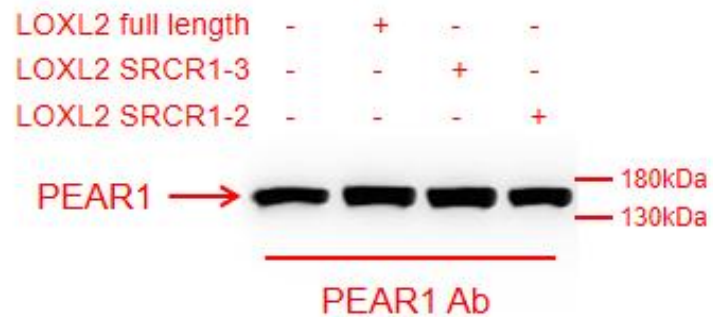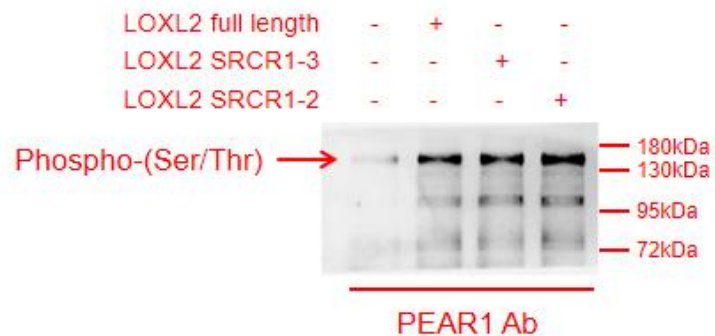

Full unedited blot for Figure [5J]

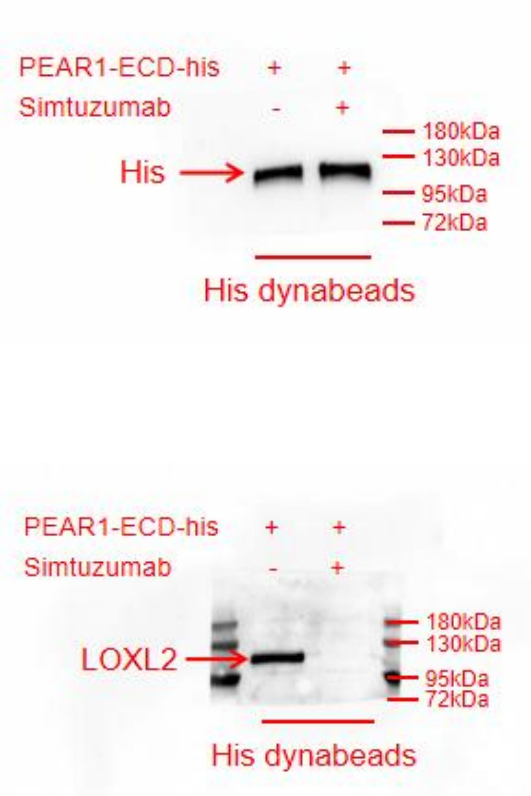

Full unedited blot for Figure [5M]

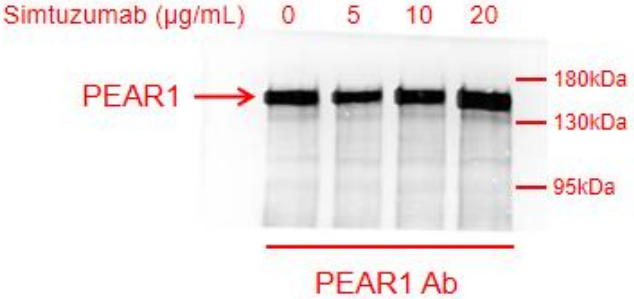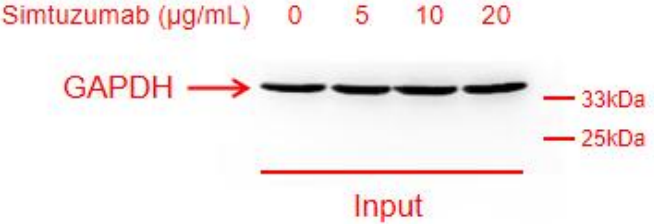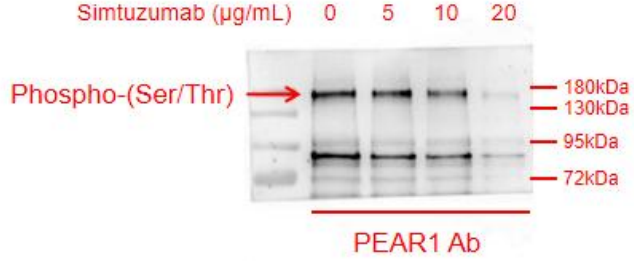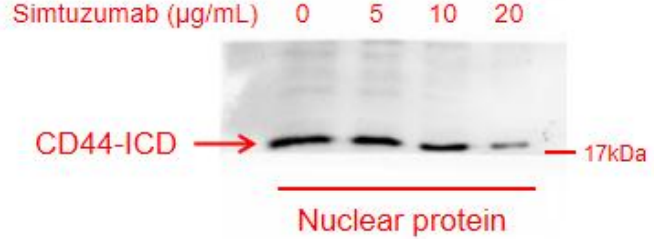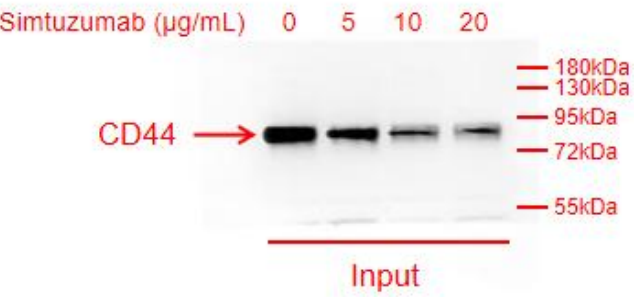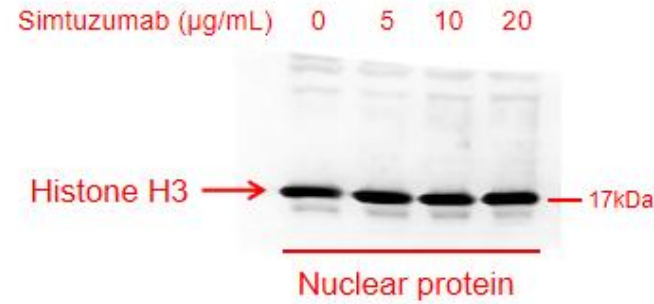



# Full unedited blot for Figure [6E]

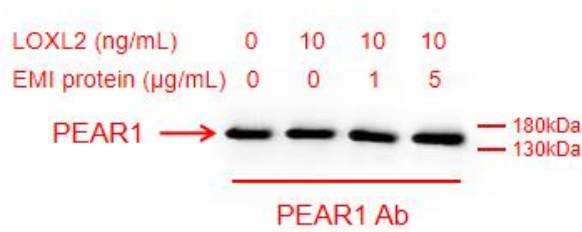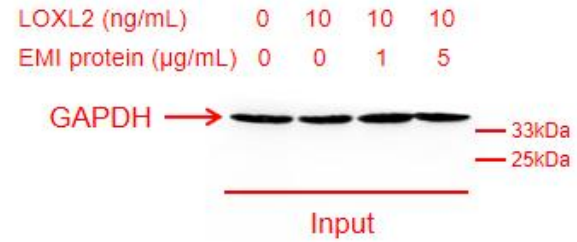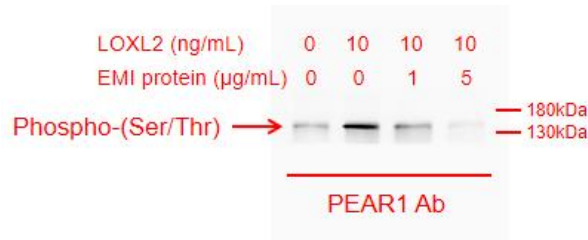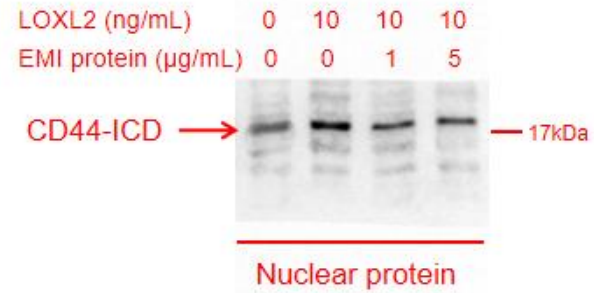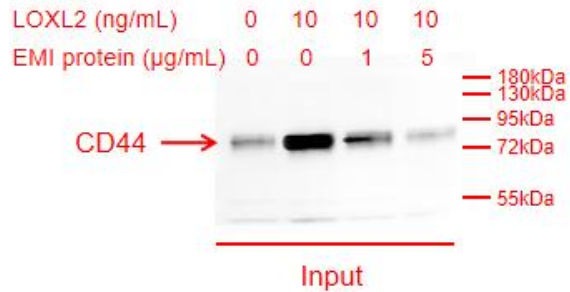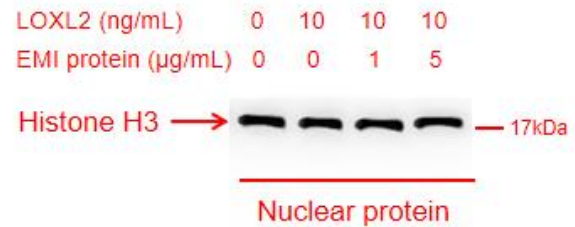

Full unedited blot for Figure [6H]

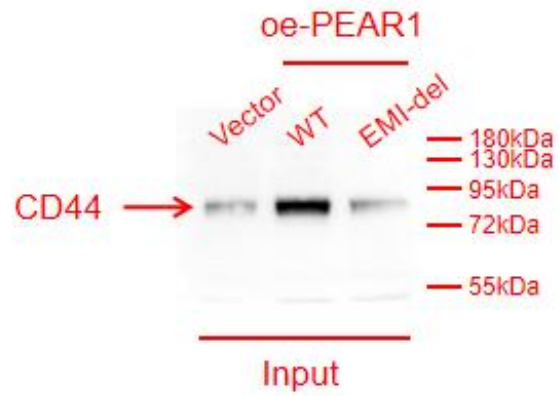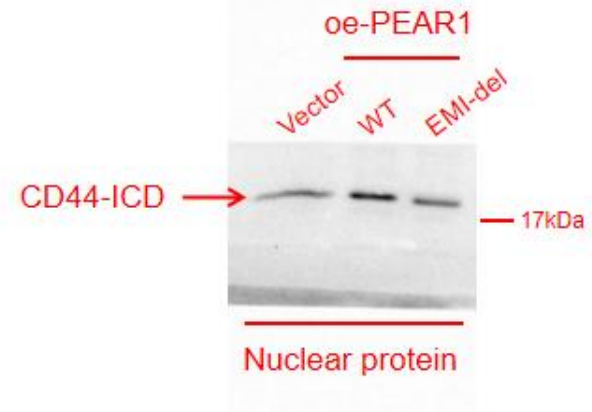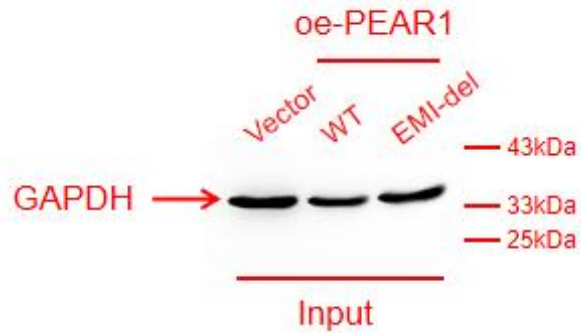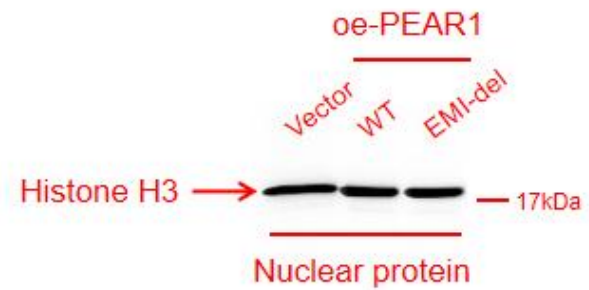

# Full unedited blot for Figure [6K]

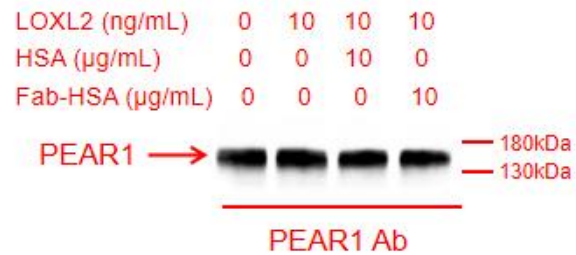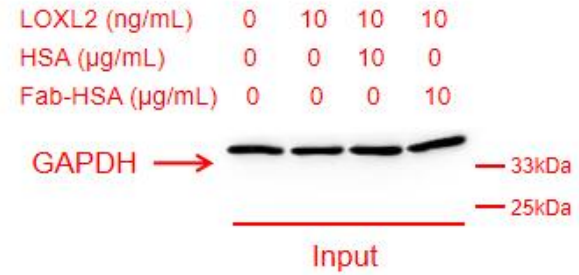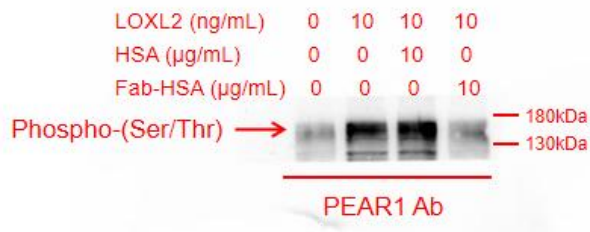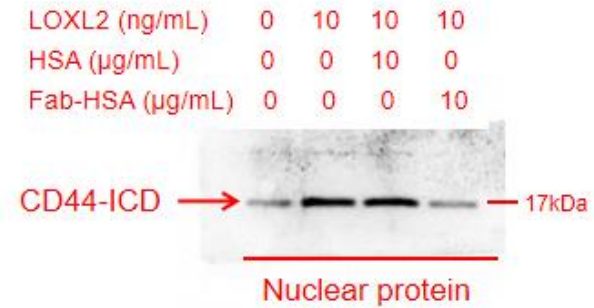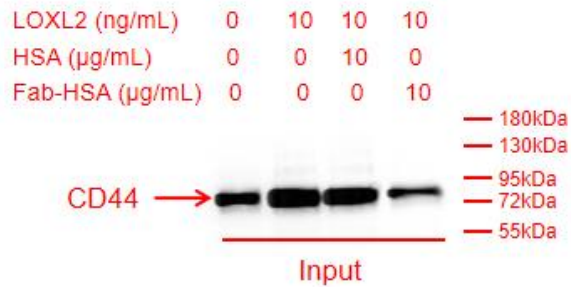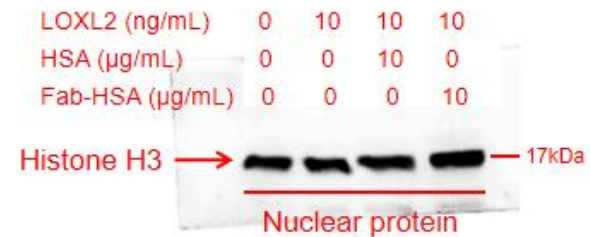

Full unedited blot for Figure [S2A]

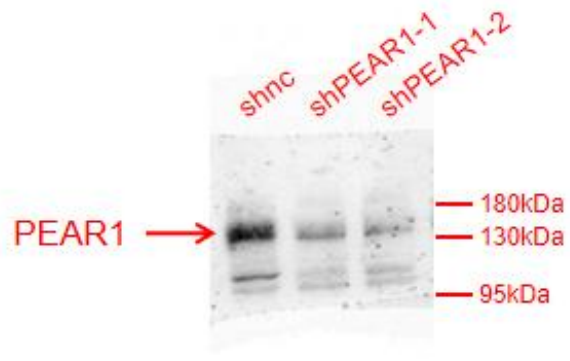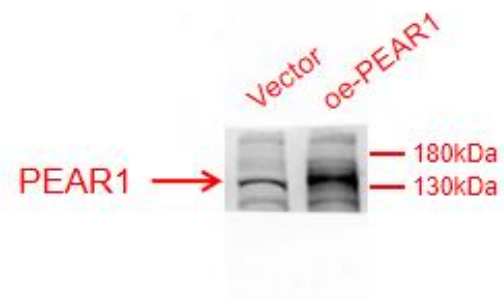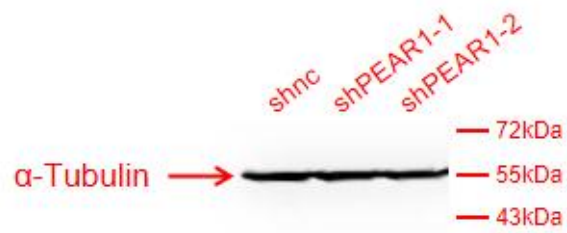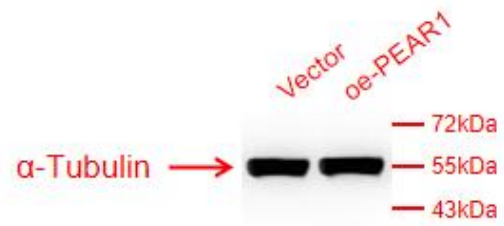

Full unedited blot for Figure [S2B]

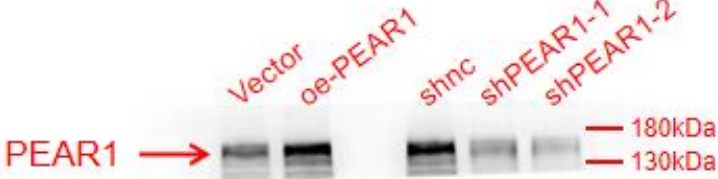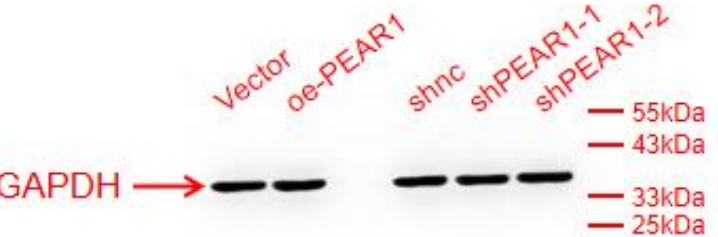

Full unedited blot for Figure [S2C]

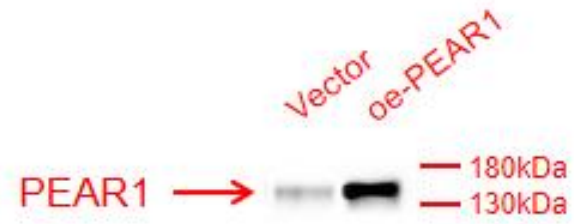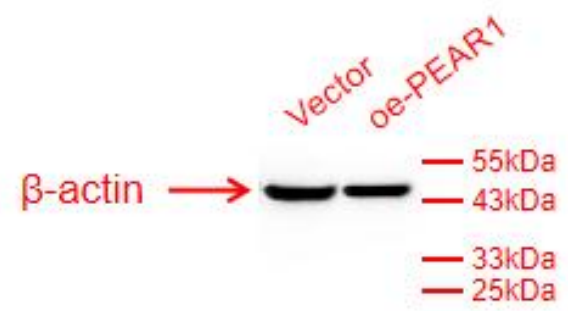

Full unedited blot for Figure [S3A]

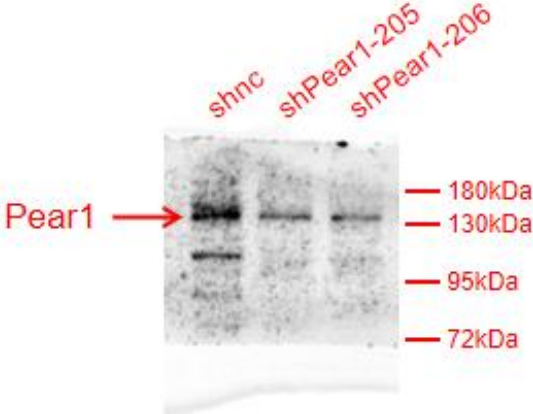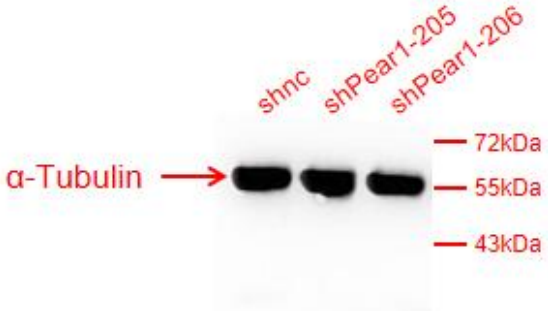

Full unedited blot for Figure [S4B]

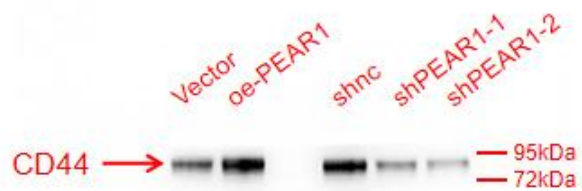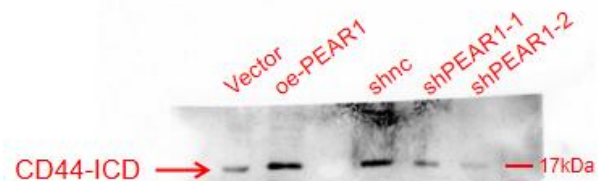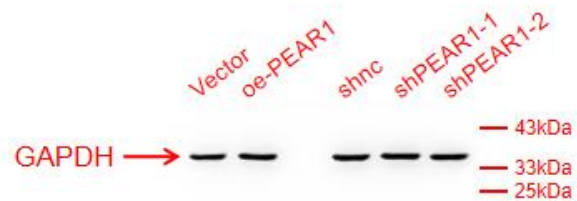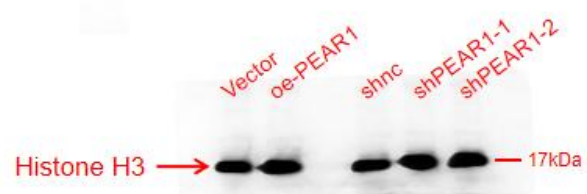



Full unedited blot for Figure [S4D]

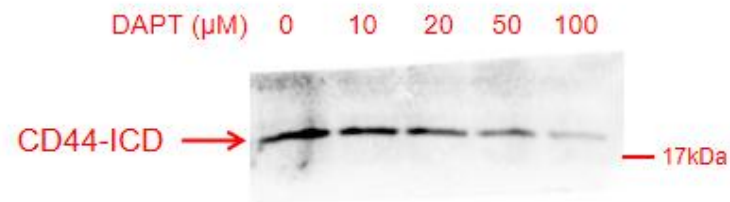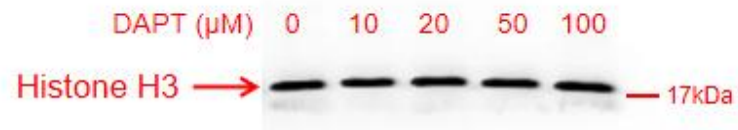

Full unedited blot for Figure [S5A]

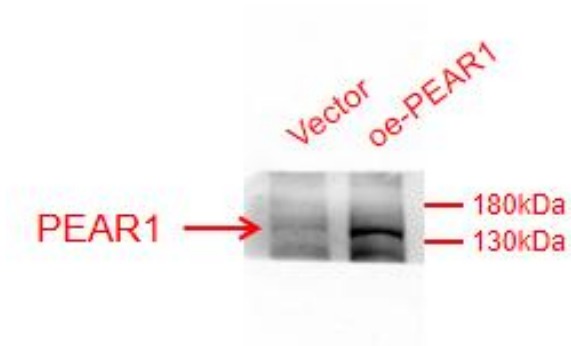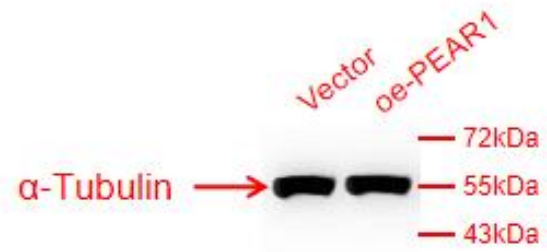

Full unedited blot for Figure [S5E]

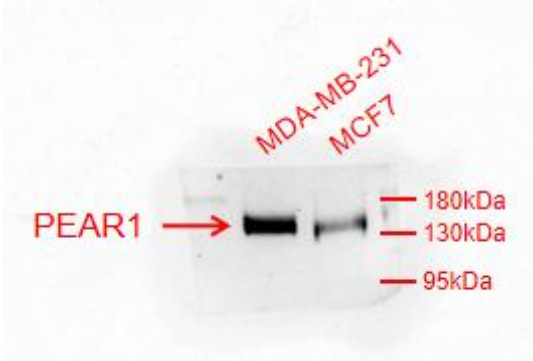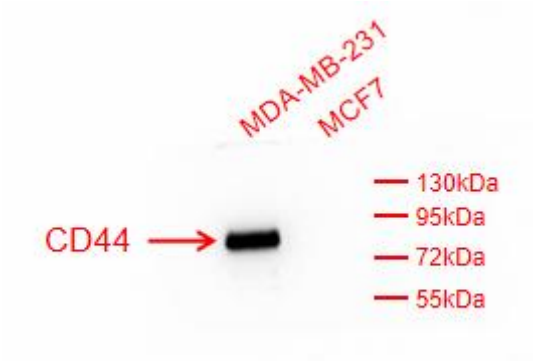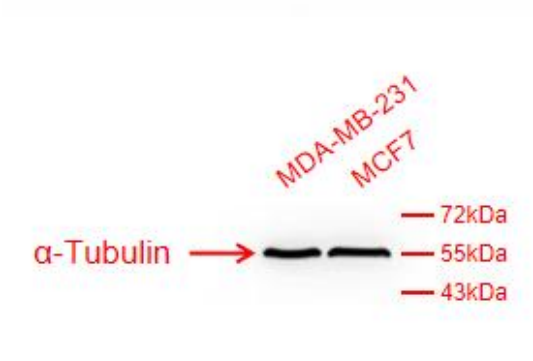

Full unedited blot for Figure [S5F]

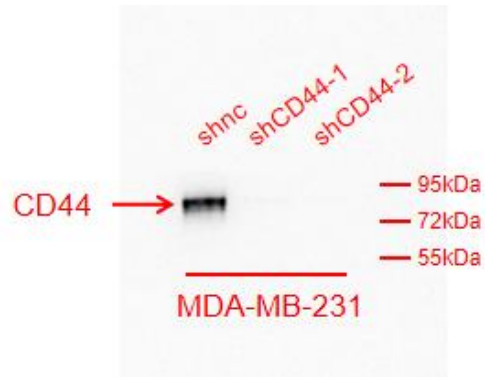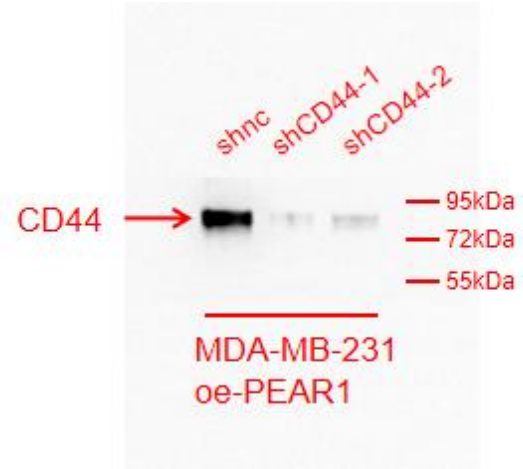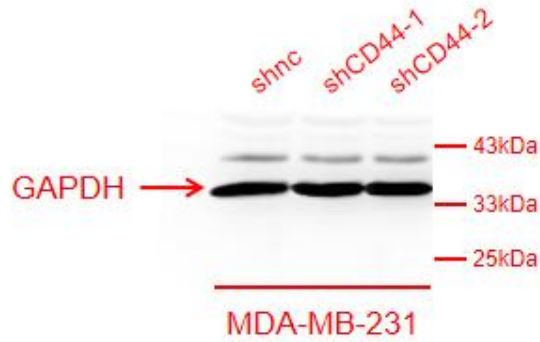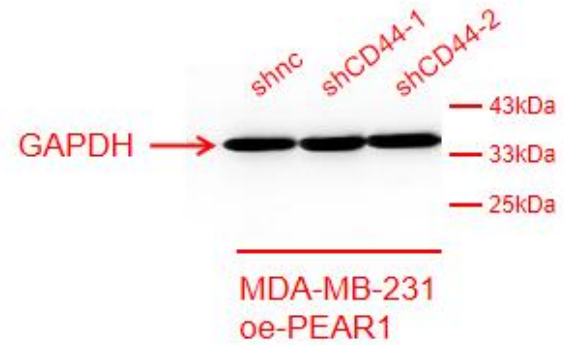

Full unedited blot for Figure [S6H]

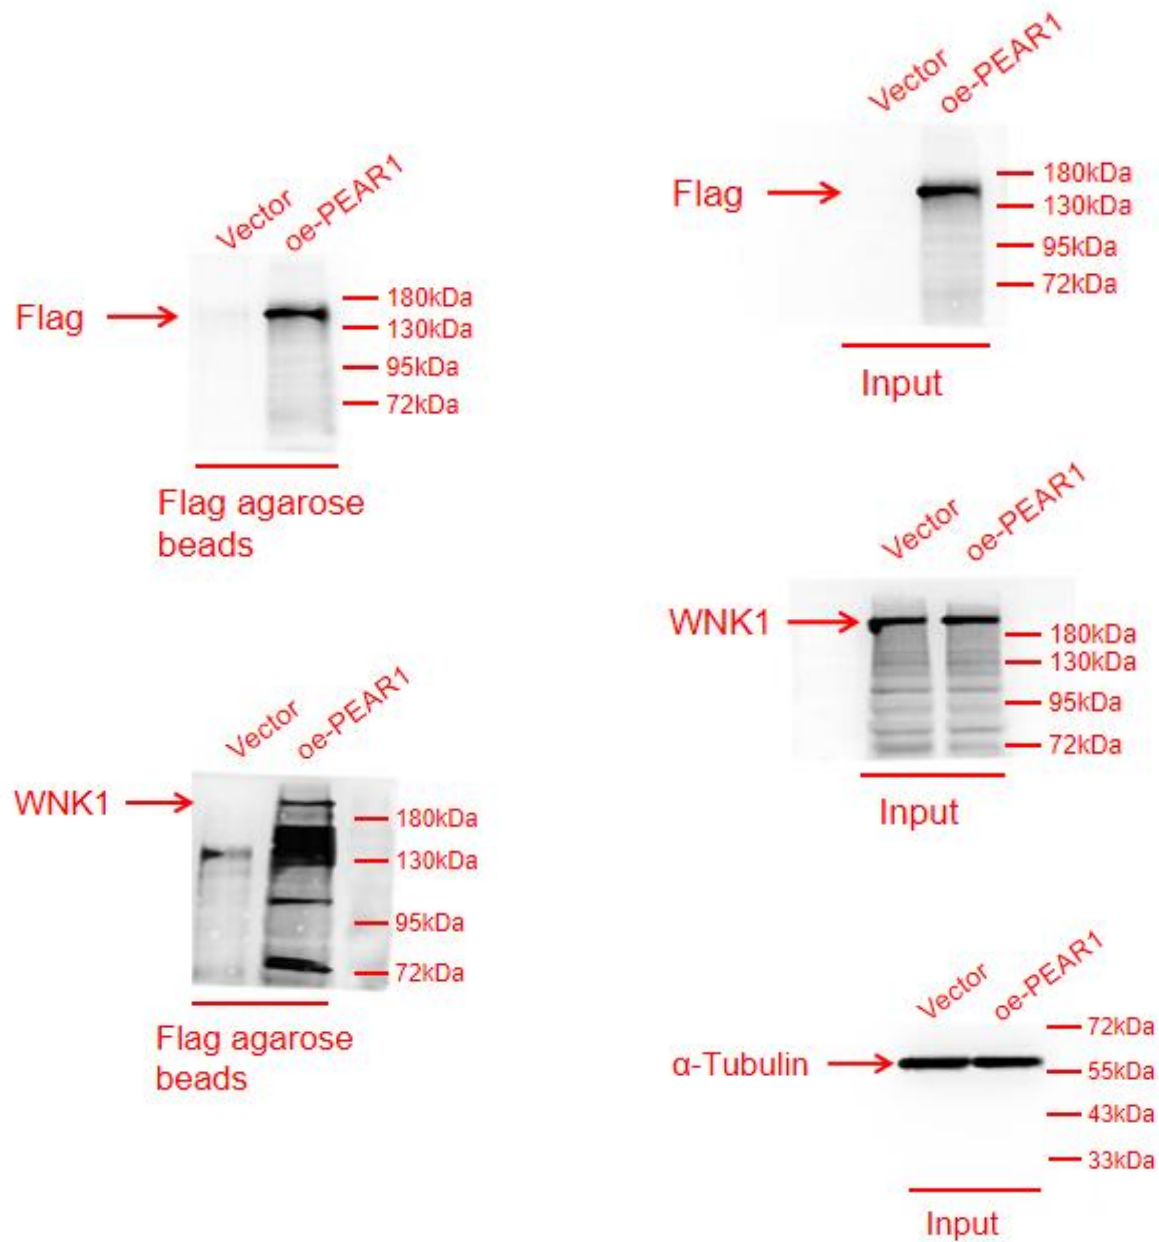

Full unedited blot for Figure [S6I]

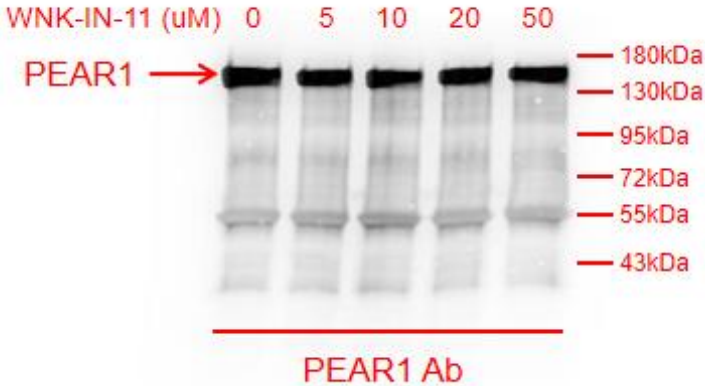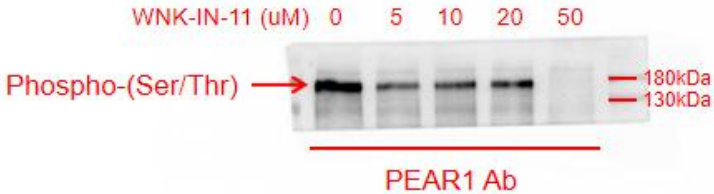

Full unedited gel for Figure [S7A]

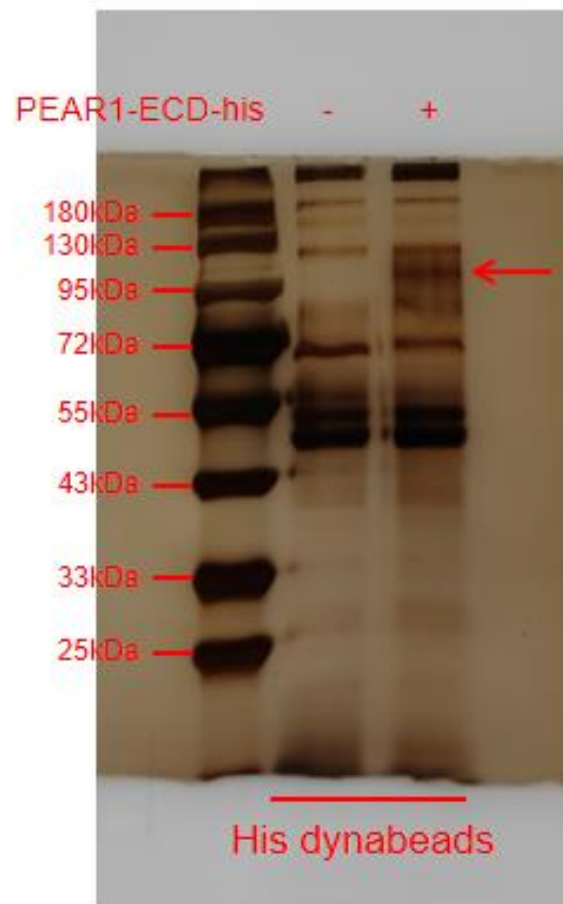

Full unedited blot for Figure [S9C]

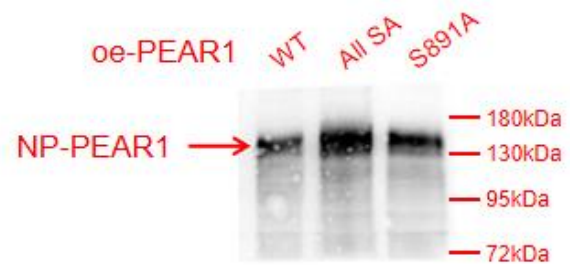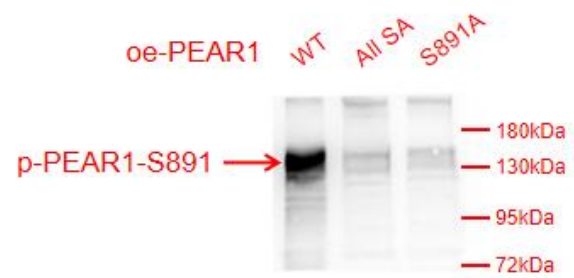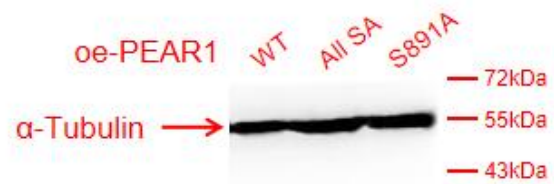



Full unedited blot for Figure [S9D]

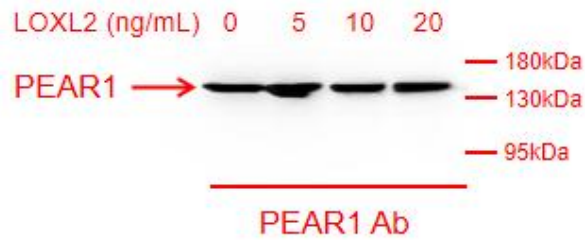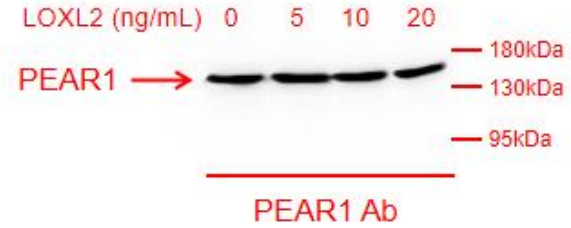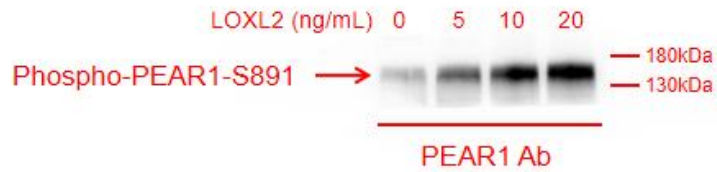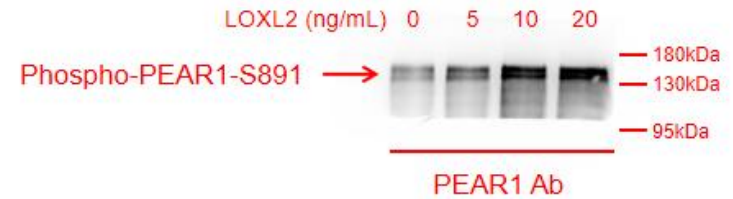

Supplement: jci-134-177357-s184.pdf [file jci-134-177357-s184.pdf]
